# Supplementary material
Source: publisher figshare collection journal article supplement (https://acs.figshare.com/ndownloader/files/3742633)
Supplement: Supplementary file 1 [file 3742633]

# Controllable Magnetism of CoO Nanoparticles Modified by the reduced graphene oxide

Xiaofeng Bi<sup>†</sup>, Wentao Liu<sup>†</sup>, Qingsong Huang<sup>\*,†</sup> and Jinghua Pang<sup>‡</sup>

<sup>†</sup>School of Chemical Engineering and <sup>‡</sup>School of Materials Science and Engineering,

Sichuan University, Chengdu 610065, China

\*Email: [qshuang@scu.edu.cn](mailto:qshuang@scu.edu.cn)

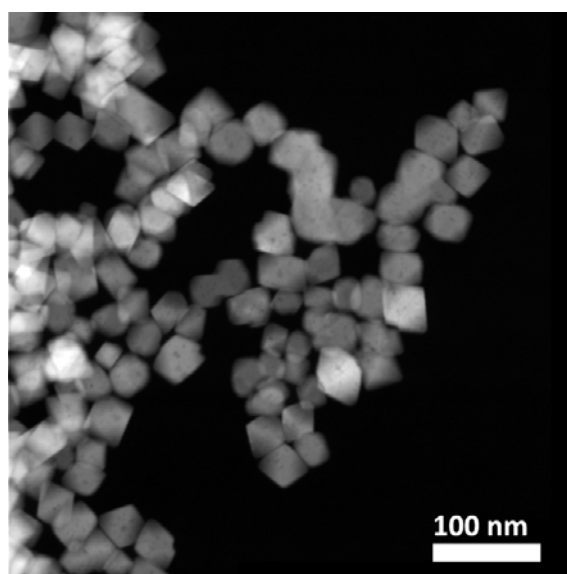

Fig. S1 HADF-STEM image of CNPs in a 50 mL Teflon lined stainless autoclave for 16 h.

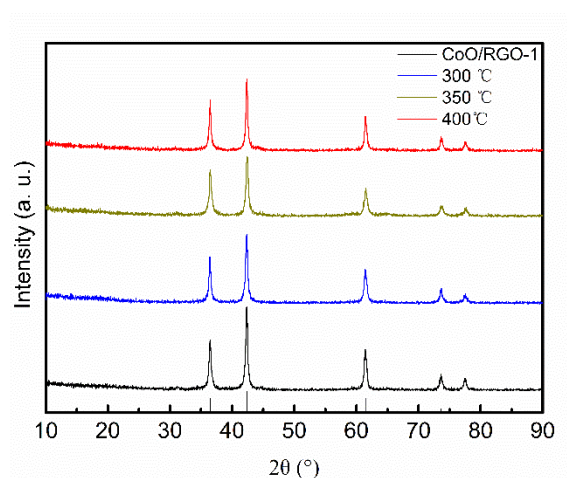

Fig. S2 The XRD patterns of CoO/RGO-1 and after heat-treatment at different temperatures.

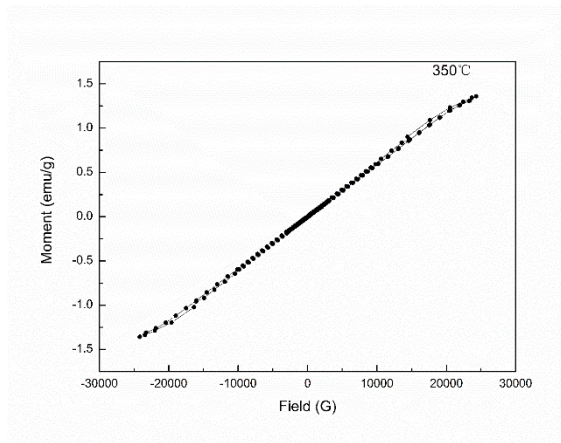

Fig. S3 Magnetization hysteresis loop for CoO/RGO-1 after heat-treatment at 350 °C.
